# Supplementary material for: The Effect of Magnetic Field on the Dynamics of Gas Bubbles in Water Electrolysis
Source: Research Square preprint supplement (doi:10.21203/rs.3.rs-283081/v1), 2021-03-08
Supplement: Supplementary file 1 [file adf5180e7281c2f9bf2fcd90.pdf]

To see the movies for experimental results demonstrated in the manuscript  
please find the below Google drive link

<https://drive.google.com/drive/folders/1stiJt7hFgdK9YdYSq42i4MtG81vP4a30>
